# Supplementary material for: X-ray diffraction in temporally and spatially resolved biomolecular science
Source: Royal Society of Chemistry journal article supplement (doi:10.1039/c4fd00166d), 2014-10-09
Supplement: c4fd00166d2.zip [file c4fd00166d2.zip]

## wwPDB Validation Report

**PDB ID:** 4R6C  
**RCSB ID:** RCSB086954  
**TITLE:** X-ray diffraction in temporally and spatially resolved biomolecular science: the X-ray crystal structure of hen egg white lysozyme cocrystallized with Ta6Br12 and then a crystal soaked in K2PtBr6  
**AUTHOR(S):** J.R.Helliwell

### Summary of PDB Entry Validation

The results of the validation of this PDB entry are shown below. No major issues were raised during data processing.

### Geometry Validation

#### 1. Atomic Clashes

No issues found.

#### 2. Peptide Linkage

No issues found.

#### 3. Covalent Geometry

No issues found.

#### 4. Chirality Error

No issues found.

#### 5. Phi/Psi Torsion Angles

No issues found.

## Individual Residue Outliers on Real Space R-value

No issues found.

## Sequence Validation

The reported biological sequence shows no discrepancy with UniProt sequence (code P00698).

The reported biological sequence and the sequence given in the coordinates show no discrepancy.

## Biological Assembly

The biological assembly predicted by PISA is a monomer. This agrees with author's annotation.

## Ligand Chemistry

Ligand chemistry has been checked against the Chemical Component Dictionary. The following is a summary.

**Identifier:** 6BP**Name:** HEXABROMOPLATINATE(IV)**Formula:** Br<sub>6</sub> Pt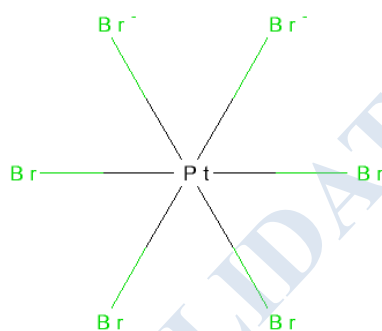

| Type                | Program               | Version | Descriptor                               |
|---------------------|-----------------------|---------|------------------------------------------|
| SMILES<br>CANONICAL | CACTVS                | 3.352   | Br[Pt](Br)(Br)(Br)(Br)Br                 |
| SMILES              | CACTVS                | 3.352   | Br[Pt](Br)(Br)(Br)(Br)Br                 |
| SMILES<br>CANONICAL | OpenEye<br>OEToolkits | 1.6.1   | Br[Pt](Br)(Br)(Br)(Br)Br                 |
| SMILES              | OpenEye<br>OEToolkits | 1.6.1   | Br[Pt](Br)(Br)(Br)(Br)Br                 |
| InChI               | InChI                 | 1.03    | InChI=1S/6BrH.Pt/h6*1H;/q;;;;;;;;;+4/p-6 |
| InChIKey            | InChI                 | 1.03    | VOEHEFXBCNCCK-UHFFFAOYSA-H               |

**Identifier:** BR  
**Name:** BROMIDE ION  
**Formula:** Br

| Type                | Program               | Version | Descriptor                  |
|---------------------|-----------------------|---------|-----------------------------|
| SMILES              | ACDLabs               | 10.04   | [Br-]                       |
| SMILES<br>CANONICAL | CACTVS                | 3.341   | [Br-]                       |
| SMILES              | CACTVS                | 3.341   | [Br-]                       |
| SMILES<br>CANONICAL | OpenEye<br>OEToolkits | 1.5.0   | [Br-]                       |
| SMILES              | OpenEye<br>OEToolkits | 1.5.0   | [Br-]                       |
| InChI               | InChI                 | 1.03    | InChI=1S/BrH/h1H/p-1        |
| InChIKey            | InChI                 | 1.03    | CPELXLSAUQHCOX-UHFFFAOYSA-M |

**Identifier:** CL**Name:** CHLORIDE ION**Formula:** Cl

| Type                | Program               | Version | Descriptor                  |
|---------------------|-----------------------|---------|-----------------------------|
| SMILES              | ACDLabs               | 10.04   | [Cl-]                       |
| SMILES<br>CANONICAL | CACTVS                | 3.341   | [Cl-]                       |
| SMILES              | CACTVS                | 3.341   | [Cl-]                       |
| SMILES<br>CANONICAL | OpenEye<br>OEToolkits | 1.5.0   | [Cl-]                       |
| SMILES              | OpenEye<br>OEToolkits | 1.5.0   | [Cl-]                       |
| InChI               | InChI                 | 1.03    | InChI=1S/ClH/h1H/p-1        |
| InChIKey            | InChI                 | 1.03    | VEXZGXHMUGYJMC-UHFFFAOYSA-M |

**Identifier:** NA**Name:** SODIUM ION**Formula:** Na

| Type                | Program               | Version | Descriptor                  |
|---------------------|-----------------------|---------|-----------------------------|
| SMILES              | ACDLabs               | 10.04   | [Na+]                       |
| SMILES<br>CANONICAL | CACTVS                | 3.341   | [Na+]                       |
| SMILES              | CACTVS                | 3.341   | [Na+]                       |
| SMILES<br>CANONICAL | OpenEye<br>OEToolkits | 1.5.0   | [Na+]                       |
| SMILES              | OpenEye<br>OEToolkits | 1.5.0   | [Na+]                       |
| InChI               | InChI                 | 1.03    | InChI=1S/Na/q+1             |
| InChIKey            | InChI                 | 1.03    | FKNQFGJONOIPTF-UHFFFAOYSA-N |

**Identifier:** TBR**Name:** HEXATANTALUM DODECABROMIDE**Synonym:** DODECABROMOHEXATANTALUM**Formula:** Br<sub>12</sub> Ta<sub>6</sub>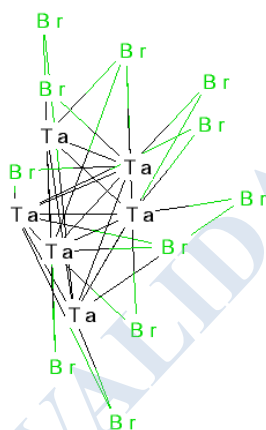

| Type                | Program               | Version | Descriptor                                                                                                                                                                                                           |
|---------------------|-----------------------|---------|----------------------------------------------------------------------------------------------------------------------------------------------------------------------------------------------------------------------|
| InChI               | InChI                 | 1.02    | InChI=1S/12BrH.6Ta/h12*1H;,,,,,;q,,,,,;+1/p-1                                                                                                                                                                        |
| InChIKey            | InChI                 | 1.02    | YWYIQTPPCOBSGN-UHFFFAOYSA-M                                                                                                                                                                                          |
| SMILES<br>CANONICAL | CACTVS                | 3.370   | Br[1][Ta][2][3][4][5][Br][Ta][6][7][89%10][2]<br>Br[Ta][%11][%12][%13][%14][1][3][6Br][Ta][%15]<br>[%16][%17][7][%11](Br[Ta][%18][4][%12][%15](Br[%<br>13)(Br[%14]) Br[Ta][5][8][%16][%18](Br9)(Br<br>Br[%17]) Br%10 |
| SMILES              | CACTVS                | 3.370   | Br[1][Ta][2][3][4][5][Br][Ta][6][7][89%10][2]<br>Br[Ta][%11][%12][%13][%14][1][3][6Br][Ta][%15]<br>[%16][%17][7][%11](Br[Ta][%18][4][%12][%15](Br[%<br>13)(Br[%14]) Br[Ta][5][8][%16][%18](Br9)(Br<br>Br[%17]) Br%10 |
| SMILES CANONICAL    | OpenEye<br>OEToolkits | 1.7.0   | Br[Ta]123456Br[Ta]17891%10[Ta]22%11(Br7)<br>[Ta]337%12%13([Ta]484([Ta]923(Br%11)<br>(Br1)(Br4)(Br7)Br%12)(Br5)(Br%10)Br%13) Br6                                                                                      |
| SMILES              | OpenEye<br>OEToolkits | 1.7.0   | Br[Ta]123456Br[Ta]17891%10[Ta]22%11(Br7)<br>[Ta]337%12%13([Ta]484([Ta]923(Br%11)<br>(Br1)(Br4)(Br7)Br%12)(Br5)(Br%10)Br%13) Br6                                                                                      |

## Summary of Structure Factor Validation

| Structure quality                                 |        |
|---------------------------------------------------|--------|
| Average Occupancy-weighted avg temperature factor | 19.781 |

| Resolution                                        |        |
|---------------------------------------------------|--------|
| High Resolution (Author reported)                 | 1.70   |
| High Resolution (Calculated by REFMAC, V5.7.0029) | 1.700  |
| Low Resolution (Author reported)                  | 25.02  |
| Low Resolution (Calculated by REFMAC, V5.7.0029)  | 22.356 |

| Crystal data                |           |
|-----------------------------|-----------|
| Space group                 | P 43 21 2 |
| Total number of reflections | 12624     |
| Number of reflections used  | 11933     |
| Completeness of data        | 98.7      |

| R-factors                                       |        |
|-------------------------------------------------|--------|
| R-factor (Author reported)                      | 0.179  |
| R-factor (Calculated by REFMAC, V5.7.0029)      | 0.1921 |
| Free R-factor (Author reported)                 | 0.231  |
| Free R-factor (Calculated by REFMAC, V5.7.0029) | 0.2386 |

| Wilson statistics (PHENIX, V1.8-1069) |       |
|---------------------------------------|-------|
| Wilson B-factor                       | 14.50 |
| Wilson Scale                          | 0.69  |

| Padilla-Yeates statistics for twin detection (PHENIX, V1.8-1069) |       |
|------------------------------------------------------------------|-------|
| Padilla-Yeates $\langle  L  \rangle$                             | 0.506 |
| Padilla-Yeates $\langle L^*L \rangle$                            | 0.342 |
