# Supplementary material for: X-ray diffraction in temporally and spatially resolved biomolecular science
Source: Royal Society of Chemistry journal article supplement (doi:10.1039/c4fd00166d), 2014-10-09
Supplement: c4fd00166d2.zip [file c4fd00166d2.zip]

PDB ID : 4R6C  
 RCSB ID : RCSB086954  
 TITLE : X-ray diffraction in temporally and spatially resolved biomolecular  
 science: the X-ray crystal structure of hen egg white lysozyme  
 cocrystallized with Ta6Br12 and then a crystal soaked in K2PtBr6  
 AUTHORS : J.R.Helliwell

-----  
 The following geometrical and stereochemical features have been calculated  
 for your structure.

#### CLOSE CONTACTS

==> Close contacts in same asymmetric unit. Distances smaller than 2.2  
 Angstroms are considered as close contacts.

| Chain | Atom | Res | Seq | Chain | Atom | Res | Seq | Symm_Code     | Distance    |
|-------|------|-----|-----|-------|------|-----|-----|---------------|-------------|
| A     | TA3  | TBR | 201 | A     | BR   | BR  | 207 | ( 1, 5, 5, 5) | Dist = 2.01 |
| A     | OD2  | ASP | 18  | A     | TA4  | TBR | 201 | ( 1, 5, 5, 5) | Dist = 2.03 |

==> Close contacts based on crystal symmetry. Distances smaller than 2.2  
 Angstroms are considered as close contacts.

none

#### BOND DISTANCES AND ANGLES

-----  
 Bond and angle checks are performed by first computing the average rms  
 error for all bonds and angles relative to standard values for nucleotide  
 units [L. Clowney et al., Geometric Parameters in Nucleic Acids: Nitrogenous  
 Bases, J.Am.Chem.Soc. 1996, 118, 509-518; A. Gelbin et al., Geometric  
 Parameters in Nucleic Acids: Sugar and Phosphate Constituents, J.Am.Chem.Soc.  
 1996, 118, 519-529] and amino acid units [R.A. Engh and R. Huber, Structure  
 quality and target parameters, International Tables for Crystallography,  
 Volume F, 2001, 382-392]. Any bond or angle which deviates from the  
 dictionary values by more than six times this computed rms error is  
 identified as an outlier.

==> Covalent Bond Lengths:

The overall RMS deviation for covalent bonds relative to the standard  
 dictionary is 0.019 Angstroms

All covalent bonds lie within a 6.0\*RMSD range about the  
 standard dictionary values.

==> Covalent Angle Values:

The overall RMS deviation for covalent angles relative to the standard  
 dictionary is 1.9 degrees.

The following table contains a list of the covalent bond angles  
 greater than 6 times standard deviation.

| Deviation | Residue<br>Name | Chain<br>ID | Sequence<br>Number | AT1 | - | AT2 | - | AT3 | Bond<br>Angle | Dictionary<br>Value | Standard<br>Deviation |
|-----------|-----------------|-------------|--------------------|-----|---|-----|---|-----|---------------|---------------------|-----------------------|
| 6.4       | ASP             | A           | 18                 | CB  | - | CG  | - | OD1 | 124.7         | 118.3               | 0.9                   |

1 out of total 1379 bond angles (0.073%) have greater than 6 times  
 standard deviation.

#### TORSION ANGLES

-----  
The torsion angle distributions have been checked. To view these reports,  
please refer to the ADIT Validation Server at <http://deposit.pdb.org/validate>.

Ramachandran regions [G.J. Kleywegt and T.A. Jones, PHI/PSI-chology:  
Ramachandran Revisited, Structure 1996, 4, 1395 - 1400].

| Residue | Chain | Sequence | PSI   | PHI   |
|---------|-------|----------|-------|-------|
| ASN     | A     | 19       | 18.06 | 58.67 |

#### CHIRALITY

-----

The chirality has been checked. O1P, O2P, and hydrogen atoms which do not follow the convention defined in the IUBMB (Liebecq, C. Compendium of Biochemical Nomenclature and Related Documents, 2nd ed.; Portland Press: London and Chapel Hill, 1992) and IUPAC nomenclature (J.L. Markley, A. Bax, Y. Arata, C.W. Hilbers, R. Kaptein, B.D. Sykes, P.E. Wright and K. Wuthrich, Recommendations for the Presentation of NMR Structures of Proteins and Nucleic Acids, Pure & Appl. Chem., Vol. 70, pp. 117-142, 1998) have been standardized. Any other stereochemical violations are listed below.

none

#### SOLVENT

-----

The following solvent molecules are further than 3.5 Angstroms away from macromolecule atoms in the asymmetric unit that are available for hydrogen bonding. Solvent molecules in extended hydration shells separated by 3.5 Angstroms or less are not listed.

|        |      |   |           |         |        |        |      |       |        |        |
|--------|------|---|-----------|---------|--------|--------|------|-------|--------|--------|
| HETATM | 1125 | O | HOH A 363 | 98.584  | 61.382 | 23.240 | 1.00 | 26.36 | DIST = | 3.63 A |
| HETATM | 1141 | O | HOH A 379 | 101.054 | 57.505 | 25.705 | 1.00 | 14.78 | DIST = | 4.33 A |

We have replaced the coordinates for solvent molecules which could be translated back into the asymmetric unit. Please review all solvent molecules in your file and contact us if you have any serious objections.

#### MISSING ATOMS

-----

| RES | MOD# | C | SEQ  | ATOMS                                   |
|-----|------|---|------|-----------------------------------------|
| TBR | (    | A | 202) | TA4 TA5 BR1 BR3 BR6 BR7 BR8 BR9 BRA BRB |
| 6BP | (    | A | 203) | BR4                                     |
| 6BP | (    | A | 204) | BR4 BR5                                 |
